# Supplementary material
Source: publisher figshare collection journal article supplement (https://tandf.figshare.com/articles/dataset/_/1266505)
Supplement: Supplementary file 2 [file 2]

# Proof of Theorem 1

Consider the information matrix  $I(\theta, \xi_t)$  for a single design time  $t$ . Then the set  $\{1, e^{-2\alpha_2/t}, \frac{1}{t}e^{-2\alpha_2/t}\}$  forms a Tchebycheff system on any fixed interval. Then it follows from the results of Karlin and Studden (1966, p.333) and of Fedorov (1972, pp.85-86) that, for any fixed parameters, the D-optimal design is based on exactly two points of support.

As observed by Mukhopadhyay and Haines (1995), a necessary and sufficient condition for a design  $\xi$  to be locally D-optimal is

$$d_{\boldsymbol{\theta}}(\xi, t) = \text{tr}[\mathbf{I}(\boldsymbol{\theta}, \xi_t)\mathbf{I}(\boldsymbol{\theta}, \xi)^{-1}] - 2 \leq 0, \quad (1)$$

for all  $t$  in the design space.

For any design point  $t$  in the design space, it is easy to see that

$$d_{\boldsymbol{\theta}}(\xi, t) = 2e^{-\frac{2\alpha_2}{t}} \frac{e^{-\frac{2\alpha_2}{t_1}} (\frac{1}{t} - \frac{1}{t_1})^2 + e^{-\frac{2\alpha_2}{t_2}} (\frac{1}{t} - \frac{1}{t_2})^2}{e^{-2\alpha_2(\frac{1}{t_1} + \frac{1}{t_2})} (\frac{1}{t_2} - \frac{1}{t_1})^2}, \quad (2)$$

and we want  $d_{\boldsymbol{\theta}}(\xi, t) \leq 0$  for all points between  $t_{\min}$  and  $t_{\max}$ . Taking the derivative with respect to  $t$ , we have

$$d'_{\boldsymbol{\theta}}(\xi, t) = \frac{4e^{-\frac{\alpha_2}{t}}}{t^2 e^{-2\alpha_2(\frac{1}{t_1} + \frac{1}{t_2})} (\frac{1}{t_2} - \frac{1}{t_1})^2} \times (\alpha - 1) [e^{\frac{2\alpha_2}{t_1}} (\frac{1}{t} - \frac{1}{t_1})^2 + e^{\frac{2\alpha_2}{t_2}} (\frac{1}{t} - \frac{1}{t_2})^2]. \quad (3)$$

Plugging in  $t_2$  in (3), we find  $d'_{\boldsymbol{\theta}}(\xi, t_2) \geq 0$ , which implies  $t_2 = t_{\max}$ .

Next, note that  $\xi$  will be a locally D-optimal design if  $d_{\boldsymbol{\theta}}(\xi, t)$  has a local maximum value at  $t_1$ . Setting  $d'_{\boldsymbol{\theta}}(\xi, t) = 0$ , we find  $t_1 = \frac{\alpha_2 t_2}{\alpha_2 + t_2}$ . If  $\frac{\alpha_2 t_2}{\alpha_2 + t_2} < t_{\min}$ , then  $d'_{\boldsymbol{\theta}}(\xi, t) < 0$  for  $t \in [t_{\min}, t_{\max}]$ . It follows that  $d_{\boldsymbol{\theta}}(\xi, t)$  is a decreasing function in  $[t_{\min}, t_{\max}]$ ; thus  $d_{\boldsymbol{\theta}}(\xi, t)$  will have its local maximum at  $t_{\min}$ . Consequently,  $t_1^* = \max(\frac{\alpha_2 t_2}{\alpha_2 + t_2}, t_{\min})$ .

Also, by the definition of D-optimal design, the above design identifies an ellipsoid which contains all points on  $\mathbf{v}_1(t), t \in [t_{\min}, t_{\max}]$  with minimum volume. There will be two points,  $\frac{\alpha_2 t_{\max}}{\alpha_2 + t_{\max}}, t_{\max}$  at the boundary of the above ellipsoid.

## References:

- Fedorov, V. V. (1972), *Theory of Optimal Experiments*, New York: Academic Press.
- Karlin, S. and Studden, W. J. (1966), “*Tchebycheff Systems, with Applications in Analysis and Statistics*,” New York: Interscience Publishers.
