# Supplementary material
Source: publisher figshare collection journal article supplement (https://tandf.figshare.com/articles/dataset/_/1266505)

Median MSE for  $\alpha_1$ 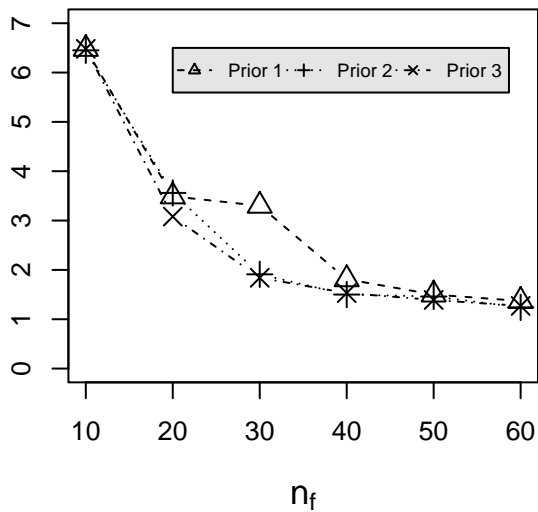Median MSE for  $\alpha_2$ 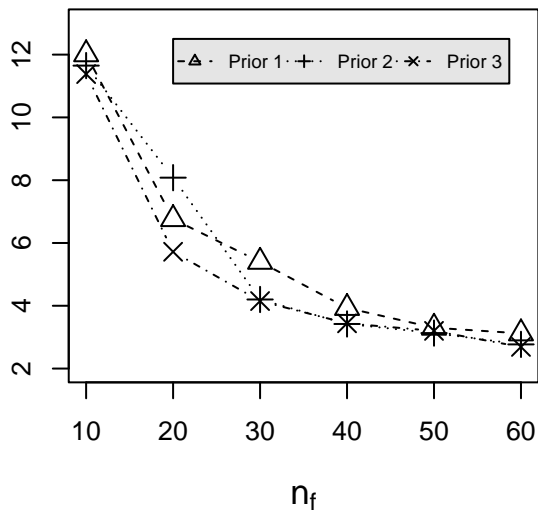Median MSE for  $b$ 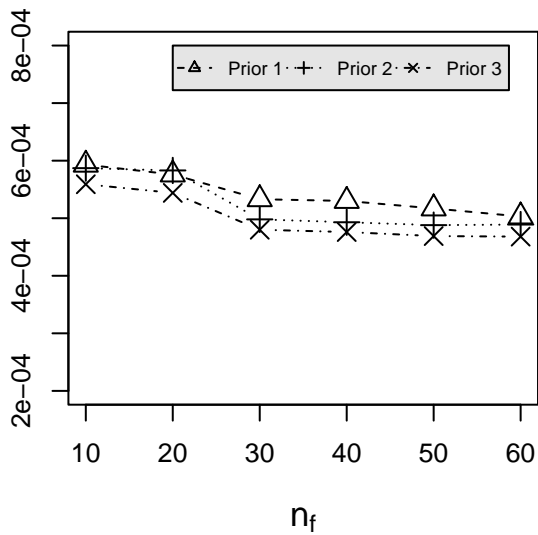Median MSE for  $\sigma^2$ 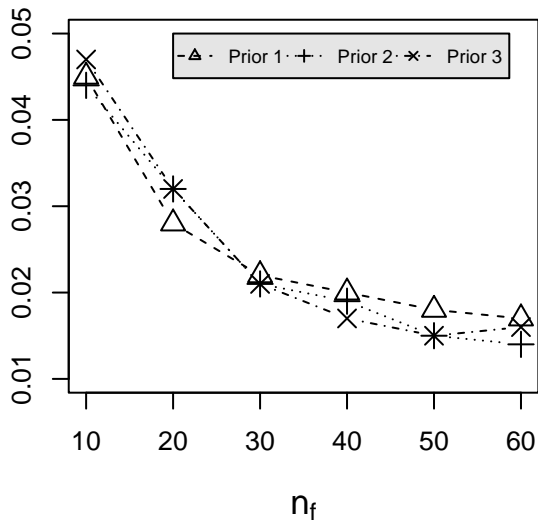

Supplement: Supplementary file 1 [file 2]
